# Supplementary material for: The stability of soil organic carbon across topographies in a tropical rainforest
Source: PeerJ. 2021 Aug 27;9:e12057. doi: 10.7717/peerj.12057 (PMC8404569; doi:10.7717/peerj.12057)
Supplement: Supplemental Information 1 [file peerj-09-12057-s001.xlsx]

## Sheet: Sheet1
quadrat Number	topography classification	soil moisture	alititude	soil organic carbon content	total nitrogen	total phosphorus content	available phosphorus content	ammoniacal nitrogen	nitric nitrogen	pH value	II	DI	alkyl carbons	O-alkyl carbon	aromatic carbon	Carboxylic carbons
Q0122	1	22.35	883.58	24.92	1.15	62.78	2.51	10.51	0.76	4.55	0.65	1.08	0.36	0.33	0.04	0.28
Q0203	1	14.06	871.64	29.51	1.25	72.79	3.98	11.42	0.07	4.52	0.64	1.09	0.36	0.33	0.03	0.27
Q0227	1	21.1	884.37	32.38	1.39	52.91	1.33	10.18	1.46	4.49	0.69	1.16	0.38	0.33	0.03	0.26
Q0306	1	12.84	879.89	32.42	1.43	70.85	2.65	10.14	1.56	4.63	0.53	0.83	0.32	0.39	0.03	0.27
Q0405	1	11.58	877.73	31.07	1.42	79.82	2.37	9	1.33	4.32	0.68	1.14	0.39	0.34	0.02	0.26
Q0703	1	20.56	870.47	35.1	1.75	52.02	2.79	15.49	1.98	4.42	0.91	1.44	0.42	0.29	0.05	0.23
Q2813	1	19.92	932.86	23.93	1.39	70.13	2.54	51.67	5.3	4.28	0.78	1.34	0.41	0.3	0.03	0.26
Q3208	1	19.7	923.58	25.01	1.48	127.71	2.5	51.31	5.8	4.53	0.78	1.33	0.4	0.3	0.03	0.26
Q4004	1	28.55	950.05	31.83	1.43	70.85	2.73	37.36	2.05	4.07	0.61	0.92	0.36	0.39	0.02	0.23
Q4219	1	25.55	973.38	31.15	1.67	70.51	3.08	51.62	3.05	4.17	0.77	1.17	0.42	0.36	0.02	0.21
Q4223	1	26.69	956.81	27.75	1.56	86.99	2.96	62.27	5.58	4.57	0.79	1.22	0.43	0.35	0.02	0.21
Q4812	1	27.64	959.14	30.9	1.72	72.05	3.11	42.56	5.78	4.56	0.78	1.3	0.42	0.33	0.02	0.24
Q0706	2	17.47	875.06	26.19	1.39	77.02	3.18	19.29	2.14	4.35	0.56	0.88	0.32	0.36	0.04	0.28
Q1213	2	13.57	905.28	30.21	1.43	77.13	3.22	20.27	3.5	4.3	0.99	1.77	0.48	0.27	0.02	0.23
Q1216	2	19.53	925.83	36.73	1.68	81.67	3.49	20.15	3.47	4.26	0.95	1.72	0.45	0.26	0.04	0.25
Q1511	2	17.72	900.59	22.23	1.29	130.95	2.8	40.81	2.11	4.48	0.78	1.18	0.41	0.35	0.03	0.21
Q1711	2	15.41	907.76	26.59	1.42	64.8	2.62	39.35	4.67	4.34	0.89	1.44	0.45	0.32	0.02	0.22
Q2405	2	18.12	885.9	24.51	1.35	72.49	3.53	45.17	5.52	4.52	0.93	1.61	0.43	0.27	0.05	0.25
Q2806	2	14.62	900.06	20.83	1.23	70.3	2.97	43.38	6.56	4.6	0.96	1.58	0.42	0.27	0.07	0.24
Q3514	2	22.96	975.21	45.33	1.84	78.12	2.88	50.93	7.95	4.04	0.98	1.54	0.47	0.3	0.03	0.2
Q3703	2	23.84	952.28	30.87	1.3	69.24	2.66	42.76	1.68	4.18	0.77	1.15	0.44	0.38	0.02	0.21
Q3706	2	27.47	947.15	31.28	1.66	68.16	3.04	42.3	2.42	4.05	0.6	0.89	0.36	0.4	0.02	0.22
Q4022	2	31.63	954.88	29.53	1.79	73.54	3.36	69.03	3.84	4.24	0.66	1.03	0.41	0.39	0.02	0.24
Q4108	2	26.35	950.87	29.18	1.51	86.99	2.55	39.95	2.68	4.15	0.68	1.02	0.39	0.38	0.02	0.22
Q4122	2	30.49	959.53	33.04	2.05	96.96	2.39	69.91	4.44	4.19	0.69	1.05	0.39	0.38	0.02	0.22
Q4206	2	27.3	943.78	33.28	1.73	54.71	3.66	40.69	3.27	4.24	0.67	1.01	0.39	0.39	0.01	0.21
Q4323	2	20.11	958.75	37.5	1.75	79.59	2.79	71.6	7.16	4.66	0.91	1.41	0.45	0.32	0.03	0.21
Q1007	2	12.55	882.62	28.48	2.46	138.38	3.3	18.98	2.7	4.46	1.49	1.13	0.37	0.33	0.03	0.27
Q0207	3	9.47	879.54	33.17	1.51	49.84	2.68	9.46	1.61	4.65	0.87	1.46	0.45	0.31	0.02	0.22
Q0324	3	17.32	902.21	31.1	1.2	95.78	2.47	9.42	3.2	4.38	0.94	1.02	0.35	0.35	0.03	0.28
Q0410	3	17.98	896.05	40.21	1.58	94.98	3.28	9.05	1.31	4.19	0.93	1.22	0.4	0.32	0.04	0.24
Q0902	3	15.7	881.8	34.56	1.41	76.34	2.73	15.63	1.92	4.27	1.09	1.12	0.38	0.34	0.04	0.23
Q1306	3	15.81	904	38.15	1.76	54.15	2.5	15.83	1.7	4.34	1.07	1.14	0.41	0.36	0.02	0.21
Q1404	3	17.9	894.55	30.37	1.49	71.59	3.21	16.94	2.48	4.25	0.9	1.03	0.39	0.38	0.02	0.2
Q1411	3	16.16	904.26	31.76	1.47	77.02	2.9	18.14	2.11	4.33	0.96	1.38	0.46	0.33	0.02	0.19
Q1412	3	15.35	909.52	28.62	1.44	78.92	3.17	20.28	2.34	4.4	0.78	1.47	0.46	0.31	0.02	0.21
Q1413	3	16.78	917.35	30.51	1.45	57.4	3.08	50.44	3.01	4.39	0.77	1.51	0.47	0.31	0.02	0.2
Q1901	3	19.22	894.91	36.39	1.45	64.34	2.8	44.53	4.33	4.13	0.78	1.21	0.4	0.33	0.02	0.25
Q2101	3	15.85	888.78	30.04	1.24	92.37	3.15	46.04	4.34	4.26	0.94	1.55	0.43	0.28	0.04	0.26
Q2111	3	22.63	930.97	32.05	1.56	85.16	3.11	58.34	4.23	4.27	0.98	1.69	0.45	0.27	0.04	0.25
Q2710	3	19.02	923.23	25.7	1.44	111.72	2.87	65.59	4.28	4.21	0.77	1.62	0.44	0.27	0.04	0.25
Q1127	4	22.64	943.06	51.26	2.08	113.55	3.1	21.38	2.29	4.17	0.86	1.44	0.44	0.31	0.02	0.23
Q1317	4	25.47	941.66	45.32	2.06	96.96	2.75	19.28	2.02	4.09	0.76	1.13	0.41	0.36	0.02	0.21
Q1718	4	20.28	950.92	39.18	1.6	86.08	3.33	65.25	6.7	4.24	0.9	1.39	0.46	0.33	0.02	0.2
Q1820	4	21.97	961.58	37.86	1.54	76.12	2.94	57.77	4.4	4.18	0.76	1.16	0.41	0.36	0.02	0.21
Q1823	4	25.56	956.74	45.66	1.76	71.43	2.99	63.77	5.02	4.1	0.89	1.36	0.45	0.34	0.02	0.19
Q2022	4	26.05	966.46	42.21	1.81	92.6	2.61	47.02	4.11	4.03	0.85	1.45	0.42	0.29	0.04	0.25
Q2414	4	23.34	948.73	45.06	1.7	73.9	2.55	57.22	4.42	4.13	1.09	1.96	0.48	0.24	0.04	0.24
Q2611	4	19.07	933.76	35.69	1.7	80.65	3.03	78.25	3.96	4.08	1.07	1.97	0.43	0.22	0.03	0.21
Q2822	4	17.87	976.26	39.28	1.44	71.59	3.57	49.14	5.2	4.15	0.77	1.34	0.41	0.3	0.03	0.26
Q3419	4	25.72	990.62	45.88	1.93	78.84	2.73	49.66	4.45	4.03	0.94	1.64	0.45	0.27	0.04	0.24
Q4007	4	28.56	954.61	34.58	1.65	115.08	4.06	42.36	1.51	4.14	0.72	1.02	0.4	0.39	0.02	0.19
Q4115	4	23.9	986.74	33.29	1.43	92.49	2.79	46.73	1.04	4.14	0.8	1.2	0.47	0.39	0.02	0.23
Q4120	4	37.16	966.62	34.81	1.79	129.58	2.37	65.49	4.05	4.1	0.7	1.05	0.4	0.38	0.02	0.21
Q4312	4	21.5	972.35	37.24	1.75	85.18	2.49	53.45	3.3	4.34	0.79	1.23	0.43	0.35	0.01	0.21
Q4517	4	31.15	979.18	37.93	1.76	110.8	2.93	48.4	4.67	4.19	0.75	1.07	0.4	0.37	0.03	0.2
Q4828	4	29.38	1010.54	42.65	1.8	87.9	2.68	64.72	5.24	4.11	0.81	1.21	0.43	0.36	0.01	0.19
Q4829	4	32.49	1004.16	39.92	1.72	86.06	4.17	62.62	3.37	4.11	0.59	0.85	0.35	0.42	0.02	0.21
Q5013	4	17.3	991.07	46.8	1.76	87.89	3.2	46.85	4.14	4.26	1.16	1.88	0.52	0.28	0.02	0.19
Q4626	4	30.91	1005.47	62.82	2.49	90.61	2.68	68.15	2.94	4.25	1.07	1.35	0.47	0.35	0.01	0.17
